# Supplementary material for: Enabling high solubility of ZnO in TiO2by nanolamination of atomic layer deposition
Source: Royal Society of Chemistry journal article supplement (doi:10.1039/c5nr06264k), 2015-01-01
Supplement: c5nr06264k1.pdf [file c5nr06264k1.pdf]

*Supporting information to*

**Enabling High Solubility of ZnO in TiO<sub>2</sub> by Nanolamination of Atomic Layer  
Deposition**

Chung-Yi Su<sup>a</sup>, Chih-Chieh Wang<sup>b</sup>, Yang-Chih Hsueh<sup>a</sup>, Vitaly Gurylev<sup>a</sup>, Chi-Chung  
Kei<sup>c</sup>, and Tsong-Pyng Perng<sup>a,\*</sup>

<sup>a</sup>Department of Materials Science and Engineering, National Tsing Hua University,  
Hsinchu 300, Taiwan

<sup>b</sup>Department of Materials Science and Engineering, Feng Chia University, Taichung  
407, Taiwan

<sup>c</sup>Instrument Technology Research Center, National Applied Research Laboratories,  
Hsinchu 300, Taiwan

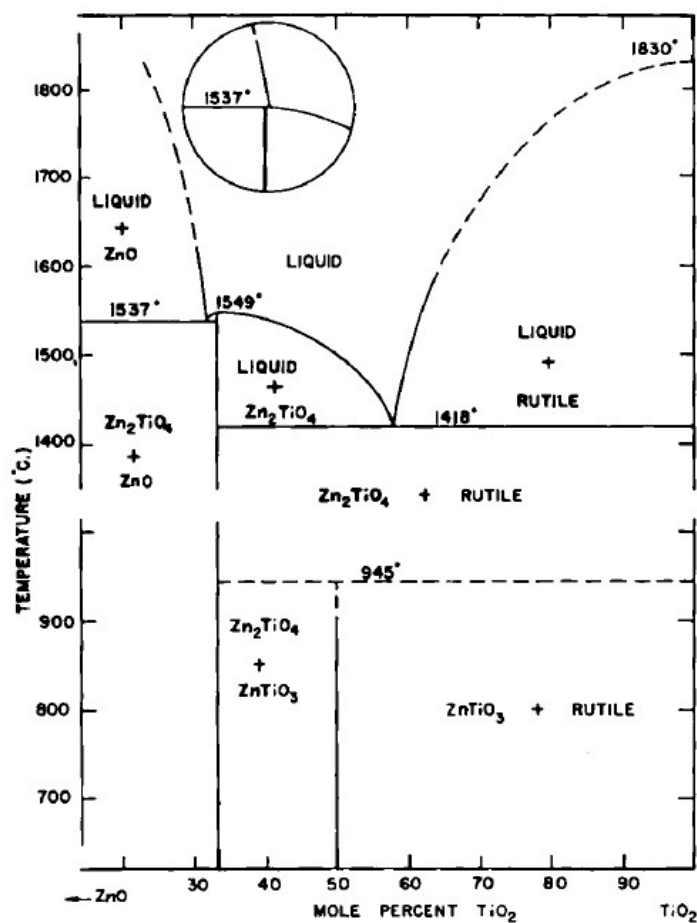

**Figure S1.** Phase diagram of ZnO-TiO<sub>2</sub> system.[7]

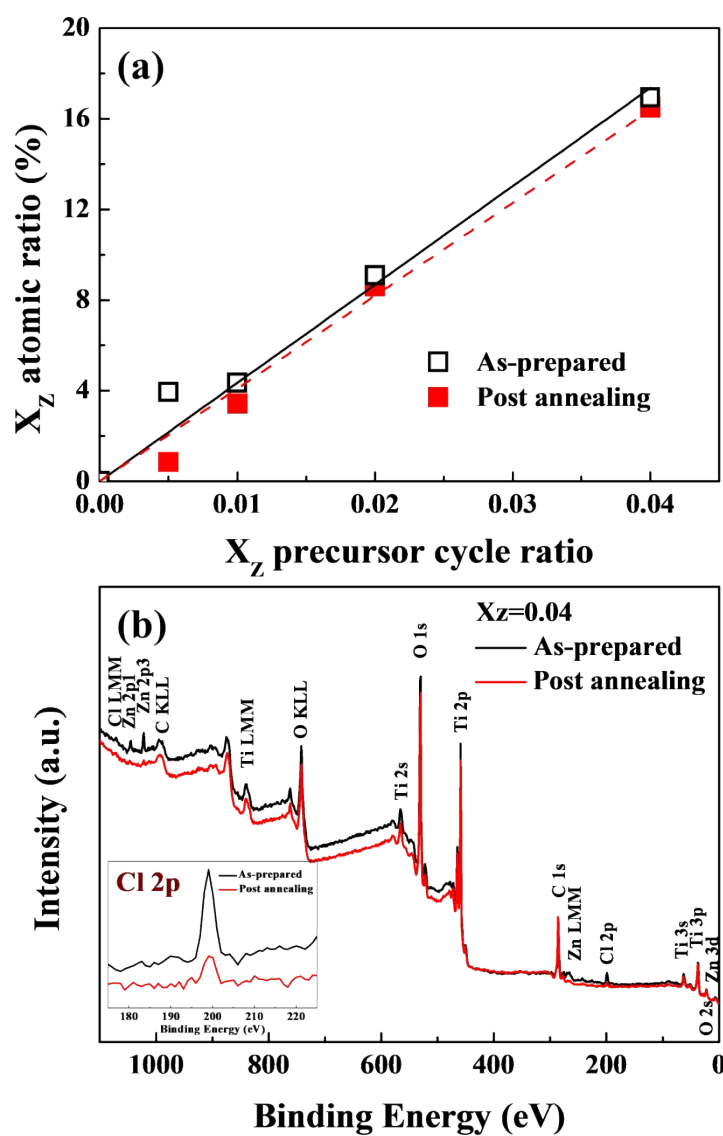

Figure S2. (a) Atomic ratios of Zn measured by XPS in Zn-doped TiO<sub>2</sub> nanotubes before and after annealing at 450 °C versus precursor cycle ratio. (b) XPS survey scans of Zn-doped TiO<sub>2</sub> with  $X_Z=0.04$  before and after annealing. The inset in (b) is Cl 2p XPS spectra.

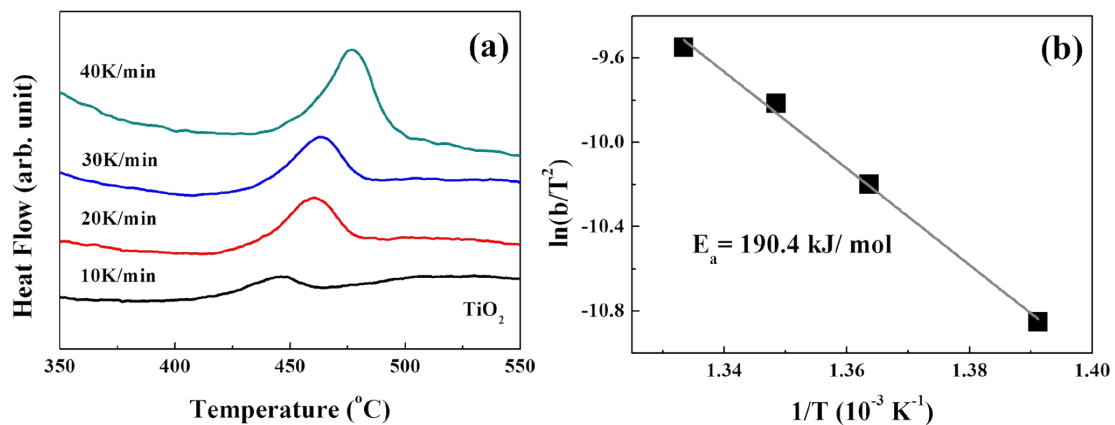

**Figure S3.** (a) DSC traces of as-deposited amorphous  $\text{TiO}_2$  on PC at various heating rates. (b) Kissinger plot of the DSC peaks for crystallization of amorphous  $\text{TiO}_2$ .

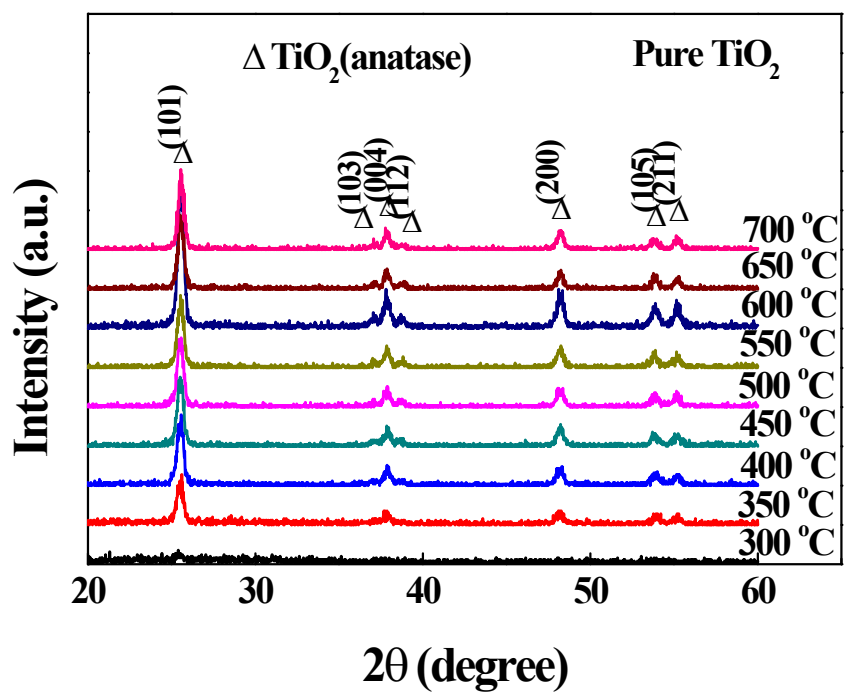

**Figure S4.** In-situ XRD patterns of pure TiO<sub>2</sub> prepared by ALD heated to different temperatures.

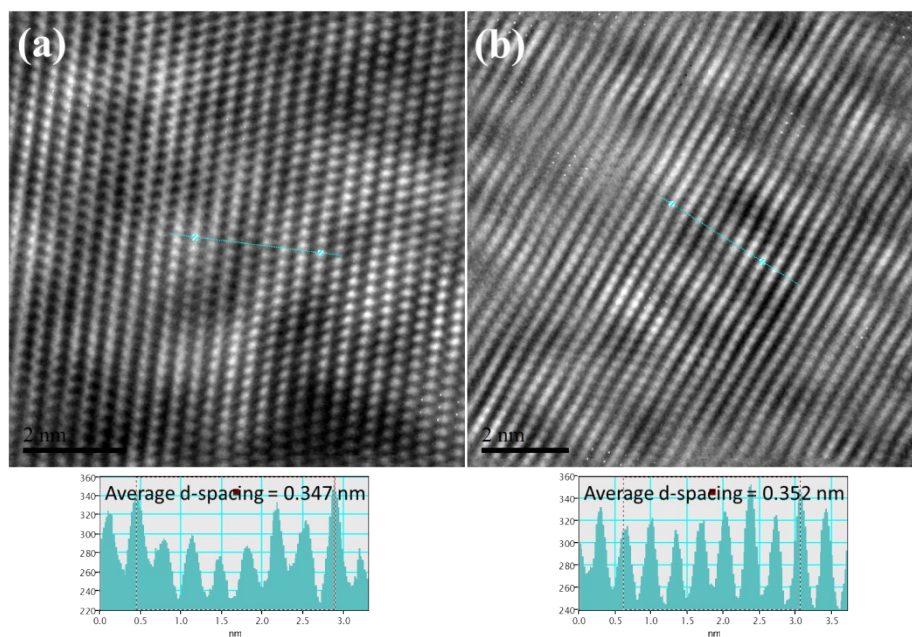

**Figure S5.** Fourier reconstructed TEM images and their corresponding lattice fringe profiles of (a) TiO<sub>2</sub> and (b) Zn-doped TiO<sub>2</sub> (X<sub>Z</sub>=0.04).

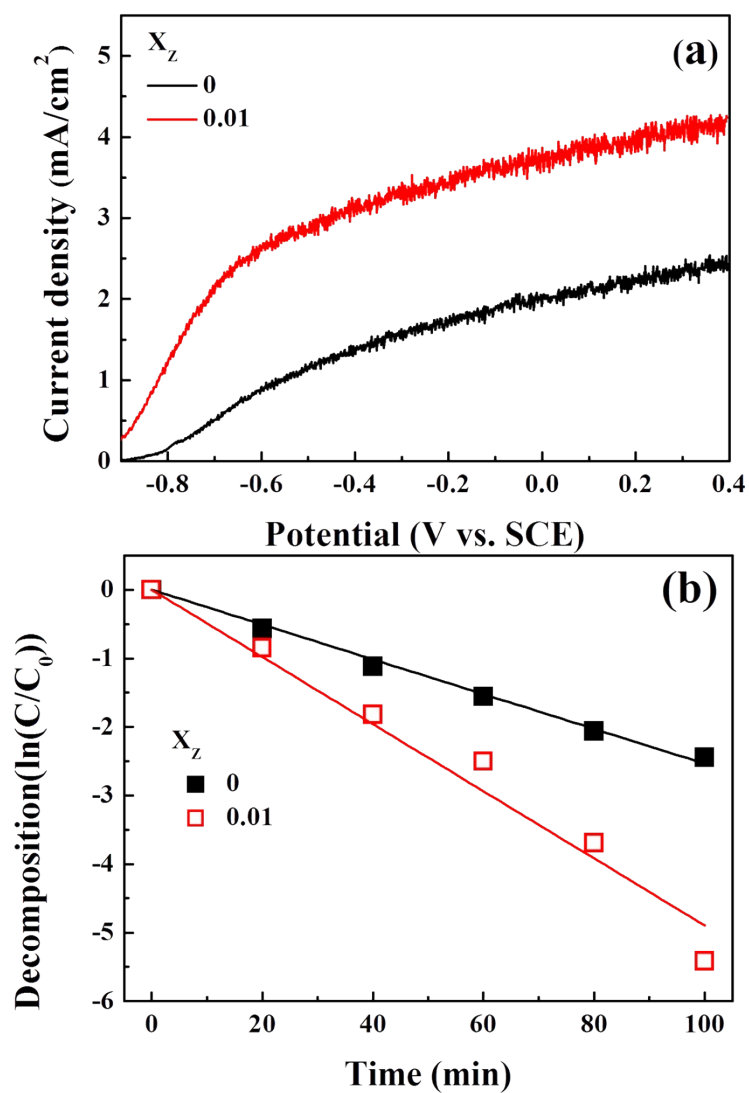

Figure S6 (a) Current-potential curves of pure TiO<sub>2</sub> and Zn-doped TiO<sub>2</sub> nanotubes by potentiodynamic scan at 10 mV/s under a 150W Xe lamp. (b) Photocatalytic decomposition of methylene blue by using pure TiO<sub>2</sub> and Zn-doped TiO<sub>2</sub> nanotubes as the photocatalysts.
